# Supplementary material for: The Future of Regenerative Medicine: Cell Therapy Using Pluripotent Stem Cells and Acellular Therapies Based on Extracellular Vesicles
Source: Cells. 2021 Jan 27;10(2):240. doi: 10.3390/cells10020240 (PMC7912181; doi:10.3390/cells10020240)
Supplement: Supplementary file 1 [file cells-10-00240-s001.xlsx]

## Sheet: Feuil1
Indication	EV source	Application	Phase	Statut	Reference
Accute ischemic stroke	Allogenic MSCs enriched by miR-124	Promote neurogenesis	I/II	Completed	NCT03384433
COVID-19	MSCs	Anti-inflammatory	I	Completed	NCT04276987
Periodontitis	Adipose derived stem cells	Anti-inflammatory to improve regenerative effect	Early I	Recruiting	NCT04270006
Neuralgia	Neonatal stem cell derived	Anti-inflammatory and pro-growth effects	N/A	Enrolling by invitation	NCT04202783
Cutaneus Ulcer	Autologous plasma-derived	Cutaneous wound healing	Early I	Enrolling by invitation	NCT02565264
Depression anxiety dementias	MSCs	Anti-inflammatory and pro-growth effects	N/A	Enrolling by invitation	NCT04202770
Multiple Organ Dysfuntion Syndrome	MSCs	Beneficial effect on ischemia-reperfusion injury	N/A	Not yet recruiting	NCT04356300
Pulmonary infection caused by gram-negative bacilli resistant to carbapenems	MSCs	Anti-inflammatory and immunomodulatory effects	I/II	Recruiting	NCT04544215
Colon Cancer	Plant	Delivery of curcumin	I	Active, not recruiting	NCT01294072
Polycystic Ovary Syndrome	Plant	Anti-inflammatory	N/A	Recruiting	NCT03493984
COVID-19	T Cell	Activate specific T-cells and stimulate secretion of mediators	I/II	Active, not recruiting	NCT04389385
chronic Graft Versus Host Diseases	UMSCs	Transfer functional molecules and regulate the function of target cells	I/II	Recruiting	NCT04213248
Diabetes mellitus Type I	MSCs	Anti-inflammatory	II/III	Unknown	NCT02138331
COVID-19	MSCs	Anti-inflammatory	I/II	Enrolling by invitation	NCT04491240
Pancreatic cancer	MSCs enriched by KrasG12D siRNA	Specific siRNA delivery against mutated gene	I	Not yet recruiting	NCT03608631
Refractory macular holes	MSCs	Promoting healing of large and refractory macular holes	Early I	Recruiting	NCT03437759
Prevent mucositosis (associated with chemoradiation treatment)	Plant	Anti-inflammatory	I	Active, not recruiting	NCT01668849
Non Small Cell Lung Cancer	Tumor antigen-loaded DCs	Anti-tumor vaccine activity	II	Completed	NCT01159288
Alzheimer	MSCs	Influence tissue responses to injury, infection, and disease	I/II	Recruiting	NCT04388982
Dystrophic Epidermolysis Bullosa	MSCs	Cutaneous wound healing	I/II	Not yet recruiting	NCT04173650
Chronic Ulcer	MSCs (conditioned medium)	Cutaneous wound healing	I	Completed	NCT04134676
COVID-19	Human Amniotic Fluid	Therapeutic	I/II	Recruiting	NCT04384445
COVID-19	Bone marrow	Anti-inflammatory and immunomodulatory effect	II	Not yet recruiting	NCT04493242
Otitis Media Chronic and Temporal Bone	Plasma	Anti-inflammatory	N/A	Completed	NCT04281901
Acute Myocardial Infarction	nd	nd	I	Not yet recruiting	NCT04327635
Malignant ascites and pleural effusion	Tumour cell-derived packaging chemoterapeutic drug	Drug delivery	II	Unknown	NCT01854866
Malignant ascites and pleural effusion	Tumour cell-derived packaging chemoterapeutic drug cisplatin	Drug delivery	II	Recruiting	NCT02657460
Malignant ascites and pleural effusion	Tumour cell-derived packaging chemoterapeutic drug methotrexate	Drug delivery	N/A	Not yet recruiting	NCT04131231
Malignant ascites	Erythrocytes, packaging methotrexate	Drug delivery	I/II	Unknown	NCT03230708
Bronchopulmonary Dysplasia	Bone marrow MSCs	Immunosuppressants	I	Recruiting	NCT03857841
